# Supplementary material for: Harmonization of Legislation on Migrating EU Citizens and Third Country Nationals: Towards a Uniform Evaluation Framework?
Source: Atypon-hosted journal article supplement (doi:10.1187/cbe.05-07-0088), 2005-01-01
Supplement: 177_1_1.pdf [file 177_1_1.pdf]

**Sequencing a genome:  
Inside the Washington University Genome Sequencing Center**

**Feedback Form for Educators**

Name \_\_\_\_\_ Date \_\_\_\_\_

**Virtual Tour (video)**

1. I think the video is at an appropriate level for my students.  
(not at all)    0    1    2    3    4    5    (very much)
2. I think my students would need preparation before viewing the video.  
(not at all)    0    1    2    3    4    5    (very much)
3. I think my students would need the Genome Sequencing Pipeline diagram as a handout while viewing the video.  
(not at all)    0    1    2    3    4    5    (very much)
4. I think my students would find the video interesting.  
(not at all)    0    1    2    3    4    5    (very much)
5. I think the video would help my students understand the science of genomic sequencing.  
(not at all)    0    1    2    3    4    5    (very much)
6. I would need to stop the video periodically during viewing to explain concepts to my students.  
(not at all)    0    1    2    3    4    5    (very much)
7. I would consider showing the video to my students.  
(not at all)    0    1    2    3    4    5    (very much)
8. Comments

---

---

---

---

---

---

**Hands On Activities**

9. I think the curriculum materials are at an appropriate level for my students.  
(not at all)    0    1    2    3    4    5    (very much)
10. I think my students would find the activities interesting.  
(not at all)    0    1    2    3    4    5    (very much)
11. I think the activities would help my students understand the science of genomic sequencing.  
(not at all)    0    1    2    3    4    5    (very much)
12. I would consider using the curriculum materials with my students.  
(not at all)    0    1    2    3    4    5    (very much)
13. Comments

---

---

---

---

---

---

**Glossary**

14. I think the glossary is at an appropriate level for my students.  
(not at all)    0       1       2       3       4       5       (very much)

15. I think my students would find the glossary useful for understanding the science of genomic sequencing.  
(not at all)    0       1       2       3       4       5       (very much)

16. I would consider using the glossary with my students.  
(not at all)    0       1       2       3       4       5       (very much)

17. Comments

---

---

---

---

---

---

**Additional Comments**
