# Supplementary material for: Harmonization of Legislation on Migrating EU Citizens and Third Country Nationals: Towards a Uniform Evaluation Framework?
Source: Atypon-hosted journal article supplement (doi:10.1187/cbe.05-07-0088), 2005-01-01
Supplement: 177_1_2.pdf [file 177_1_2.pdf]

**Sequencing a Genome:  
Inside the Washington University Genome Sequencing Center**

**Student Feedback Form**

School \_\_\_\_\_ Date \_\_\_\_\_

**Virtual Tour (video)**

1. The video was easy to follow.  
(not at all)    0    1    2    3    4    5    (very much)
2. It was useful to have the Genome Sequencing Pipeline diagram as a handout while viewing the video.  
(not at all)    0    1    2    3    4    5    (very much)
3. The video was interesting.  
(not at all)    0    1    2    3    4    5    (very much)
4. The video helped me understand what goes on at a genome sequencing center.  
(not at all)    0    1    2    3    4    5    (very much)
5. The video helped me understand the science of genomic sequencing.  
(not at all)    0    1    2    3    4    5    (very much)

6. Comments

---

---

---

---

---

**Career Interviews (video)**

7. The career interviews were interesting.  
(not at all)    0    1    2    3    4    5    (very much)
8. Viewing the career interviews made me think about what I would like to do as a career.  
(not at all)    0    1    2    3    4    5    (very much)

9. Comments

---

---

---

---

---
