# Supplementary material for: Harmonization of Legislation on Migrating EU Citizens and Third Country Nationals: Towards a Uniform Evaluation Framework?
Source: Atypon-hosted journal article supplement (doi:10.1187/cbe.05-07-0088), 2005-01-01
Supplement: 177_1_3.pdf [file 177_1_3.pdf]

**Sequencing a Genome:  
Inside the Washington University Genome Sequencing Center**

**Student Feedback Form**

School \_\_\_\_\_ Date \_\_\_\_\_

Thank you for taking time to provide feedback on this project. We will take your opinion very seriously. Please circle your responses or provide short answers to the questions below.

**Prior Knowledge**

1. What biology classes have you taken?

Principles of Biology I (2960)

Principles of Biology II (2970)

Principles of Biology III (3050)

Electives \_\_\_\_\_

\_\_\_\_\_

2. Briefly describe any independent research experience you have had that is related to molecular biology and/or genetics.

**Virtual Tour (video)**

1. The video was easy to follow.

(not at all) 0 1 2 3 4 5 (very much)

2. It was useful to have the Genome Sequencing Pipeline diagram as a handout while viewing the video.

(not at all) 0 1 2 3 4 5 (very much)

3. The video was interesting.

(not at all) 0 1 2 3 4 5 (very much)

4. The video helped me understand what goes on at a genome sequencing center.

(not at all) 0 1 2 3 4 5 (very much)

5. The video helped me understand the science of genomic sequencing.

(not at all) 0 1 2 3 4 5 (very much)

6. Please provide your comments on areas of the video that were difficult to understand and/or areas of the video that you found too basic.

---

---

---

---

---

**Career Interviews (video)**

7. The career interviews were interesting.  
(not at all)    0    1    2    3    4    5    (very much)
8. Viewing the career interviews made me think about what I would like to do as a career.  
(not at all)    0    1    2    3    4    5    (very much)
9. Comments

---

---

---

---

---
